# Supplementary material
Source: MDPI journal article supplement (https://www.mdpi.com/2079-6439/3/1/30)
Supplement: s1 [file s1]

Supplementary Materials


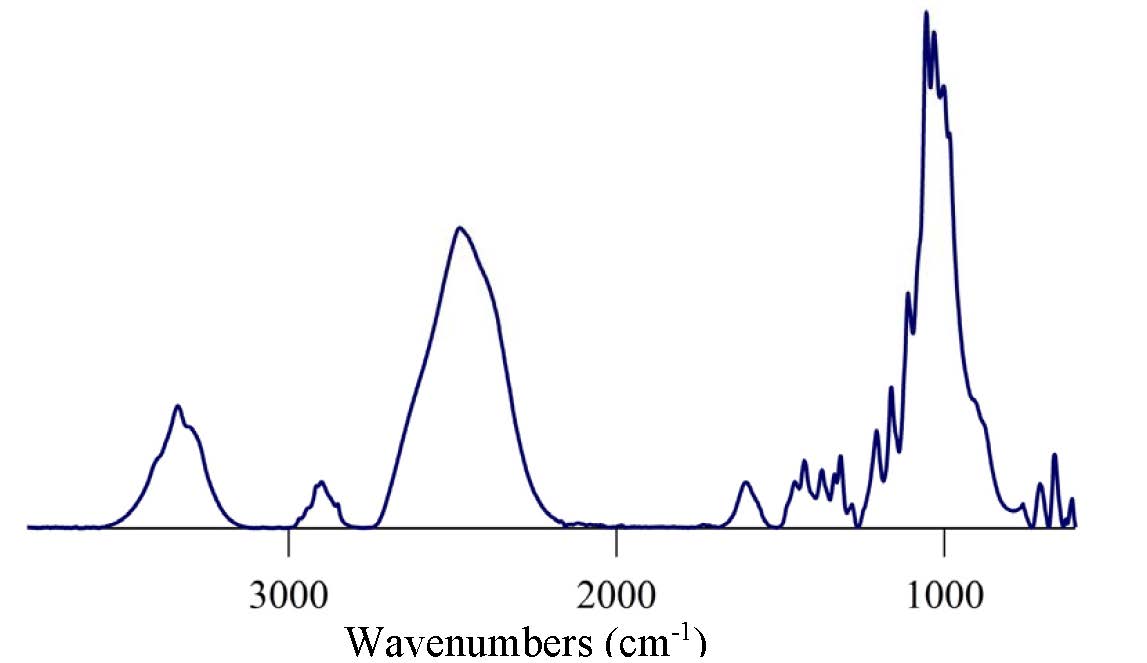


**Figure S1.** FT-IR spectra of a typical cotton fiber after treatment with D2O.


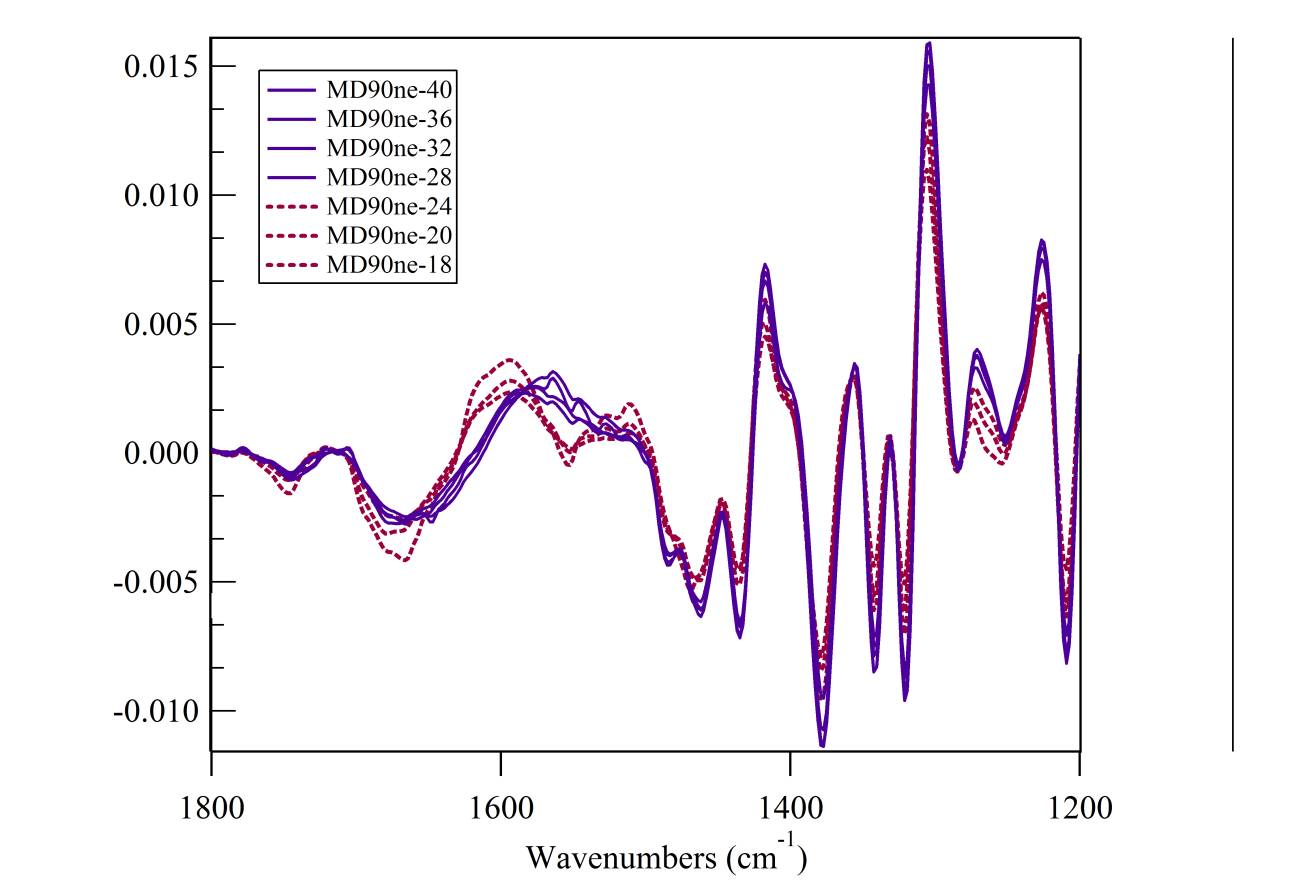


**Figure S2.** First derivative spectra of the O–H bending region (water) for cotton fibers harvested at different DPA. Interconnected lines represent fiber samples harvested at 18–24 DPA, while solid lines represent fibers harvested at 28–40 DPA.
